# Supplementary material
Source: ML conference proceedings conference paper supplement (https://openaccess.thecvf.com/content/WACV_2020/html/Song_Adaptive_Aggregation_of_WACV_2020_paper.html)
Supplement: Supplementary file 1 [file Song_Adaptive_Aggregation_of_WACV_2020_supplemental.pdf]

Archive with 12 entries (11 files):
- Videos/
- Videos/leaves.json
- Videos/leaves.mp4
- Videos/BlurBody.mp4
- Videos/Hand.mp4
- Videos/BlurBody.json
- Videos/Hand.json
- Videos/car1.json
- Videos/car1.mp4
- Videos/motocross1.json
- Videos/motocross1.mp4
- Supplementary Material of Adaptive Aggregation of Arbitrary Online Trackers with a Regret Bound.pdf
