# Supplementary material
Source: ML conference proceedings conference paper supplement (https://openaccess.thecvf.com/content/WACV_2020/html/Song_Adaptive_Aggregation_of_WACV_2020_paper.html)
Supplement: Supplementary file 1 [file Song_Adaptive_Aggregation_of_WACV_2020_supplemental.pdf › Supplementary Material of Adaptive Aggregation of Arbitrary Online Trackers with a Regret Bound.pdf]

# Supplementary Material of “Adaptive Aggregation of Arbitrary Online Trackers with a Regret Bound”

Heon Song<sup>1,2</sup>

Daiki Suehiro<sup>1,2</sup>

Seiichi Uchida<sup>1</sup>

<sup>1</sup>Kyushu University

<sup>2</sup>RIKEN AIP

{heon.song@human., suehiro@, uchida@}ait.kyushu-u.ac.jp

## 1. Details of the theoretical analysis

The regret bound of Theorem 1 is given by the regret bound of Online Mirror Descent (OMD) algorithm in the delayed setting, as proved in Theorem A.5 of [22]. In this section, we show the technical detail for deriving Theorem 1 from the following regret bound  $R_T$  of the delayed-OMD algorithm:

$$R_T = O\left(\frac{1}{\eta}(\psi(y) - \psi(\mathbf{w}_1)) + \eta \frac{G^2(T+D)}{\sigma}\right),$$

where  $\psi$  is the regularizer of  $\mathbf{w}$ .  $\sigma$  is the modulus of the loss function  $\ell$  and equals to 1.  $G$  is the difference between the maximum and minimum values of the loss function  $\ell$ .

At first, we want to prove that the above regret bound  $R_T$  also holds for the delayed-Hedge algorithm. In [9], it is shown that the Hedge algorithm is a special version of OMD. Similarly, it is also shown that the delayed-Hedge algorithm is a special version of the above delayed-OMD algorithm. Therefore, the delayed-Hedge algorithm has the same bound as  $R_T$ .

Next, we want to prove that  $\psi(y) - \psi(\mathbf{w}_1)$  is bounded by  $O(\ln N)$  for the delayed-Hedge algorithm. As described in [22],  $\psi(y) - \psi(\mathbf{w}_1)$  is bounded by  $O(\ln N)$ , with the OMD algorithm for the online expert selection problem. Although the online expert selection problem is different from our AEA problem, they can use the same OMD algorithm. This is because both problems can be tackled by the same weight-updating rule of the OMD algorithm. Therefore we have the same bound  $O(\ln N)$  of  $\psi(y) - \psi(\mathbf{w}_1)$  for the delayed-Hedge algorithm.

Finally, we achieve our Theorem 1 by considering the above bound,  $\sigma = 1$  and  $G^2 = 1$ , and by setting  $\sqrt{\ln N/(T+D)}$  to  $\eta$  (as written in the last paragraph of Section 4). Note that  $G = 1$  because our loss  $\ell$  is IoU and the difference between minimum and maximum IoU values is 1 at most.

## 2. The proof of Theorem.2

**Theorem 1.** Assume that feedback from the environment comes with probability  $r \in (0, 1]$  on each frame. The expectation of the regret of the delayed-Hedge is then bounded as follows:

$$\mathbb{E}_r[R_T] = O\left(\sqrt{\left(M^* + \frac{1}{r}M^*\right) \ln N}\right).$$

*Proof.* At each anchor frame  $u_q$ , the expectation of the period from  $u_{q-1}$  to  $u_q$  becomes  $1/r$ . Then, the delay of the period is  $\sum_{t=1}^{u_q - u_{q-1}} t = (1/r + 1)(1/2r)$ . Moreover, the expectation of the number of anchor frames becomes  $rT$ . Then, we have  $\mathbb{E}_r[D] = (1/r + 1)(1/2r) \times rT = O(T/r)$ . When we consider the expectation of the regret of  $R_T$  with  $r$ , we obtain the above bound.  $\square$

## 3. Examples of tracking results

We show several examples of tracking results with the transitions of the error (i.e., the difference from ground truth) and weight.

The folder Videos consists of the resulting videos “BlurBody”(from OTB2015), “Hand”(from TColor128), “car1”, “motocross1”, and “leaves”(from VOT2018). All videos are encoded by a standard h.264 codec. More detailed information about the videos can be found in each json file. In the video frames, we annotated the bounding boxes of each expert, the proposed method (red), Baseline(Average) (yellow), Baseline(MCCT) (orange), and ground truth (black). At only anchor frames, we also annotated the bounding box of the target location detected by using the template image (white). The vertical lines on the graphs of the error and weight indicate anchor frames.

In “BlurBody,” the best expert is SiamMask (the green one) and it keeps small error at every frame. We can see that the proposed method succeeds to give the highest weight for it from early frames of the video, and succeeds to keep small errors.

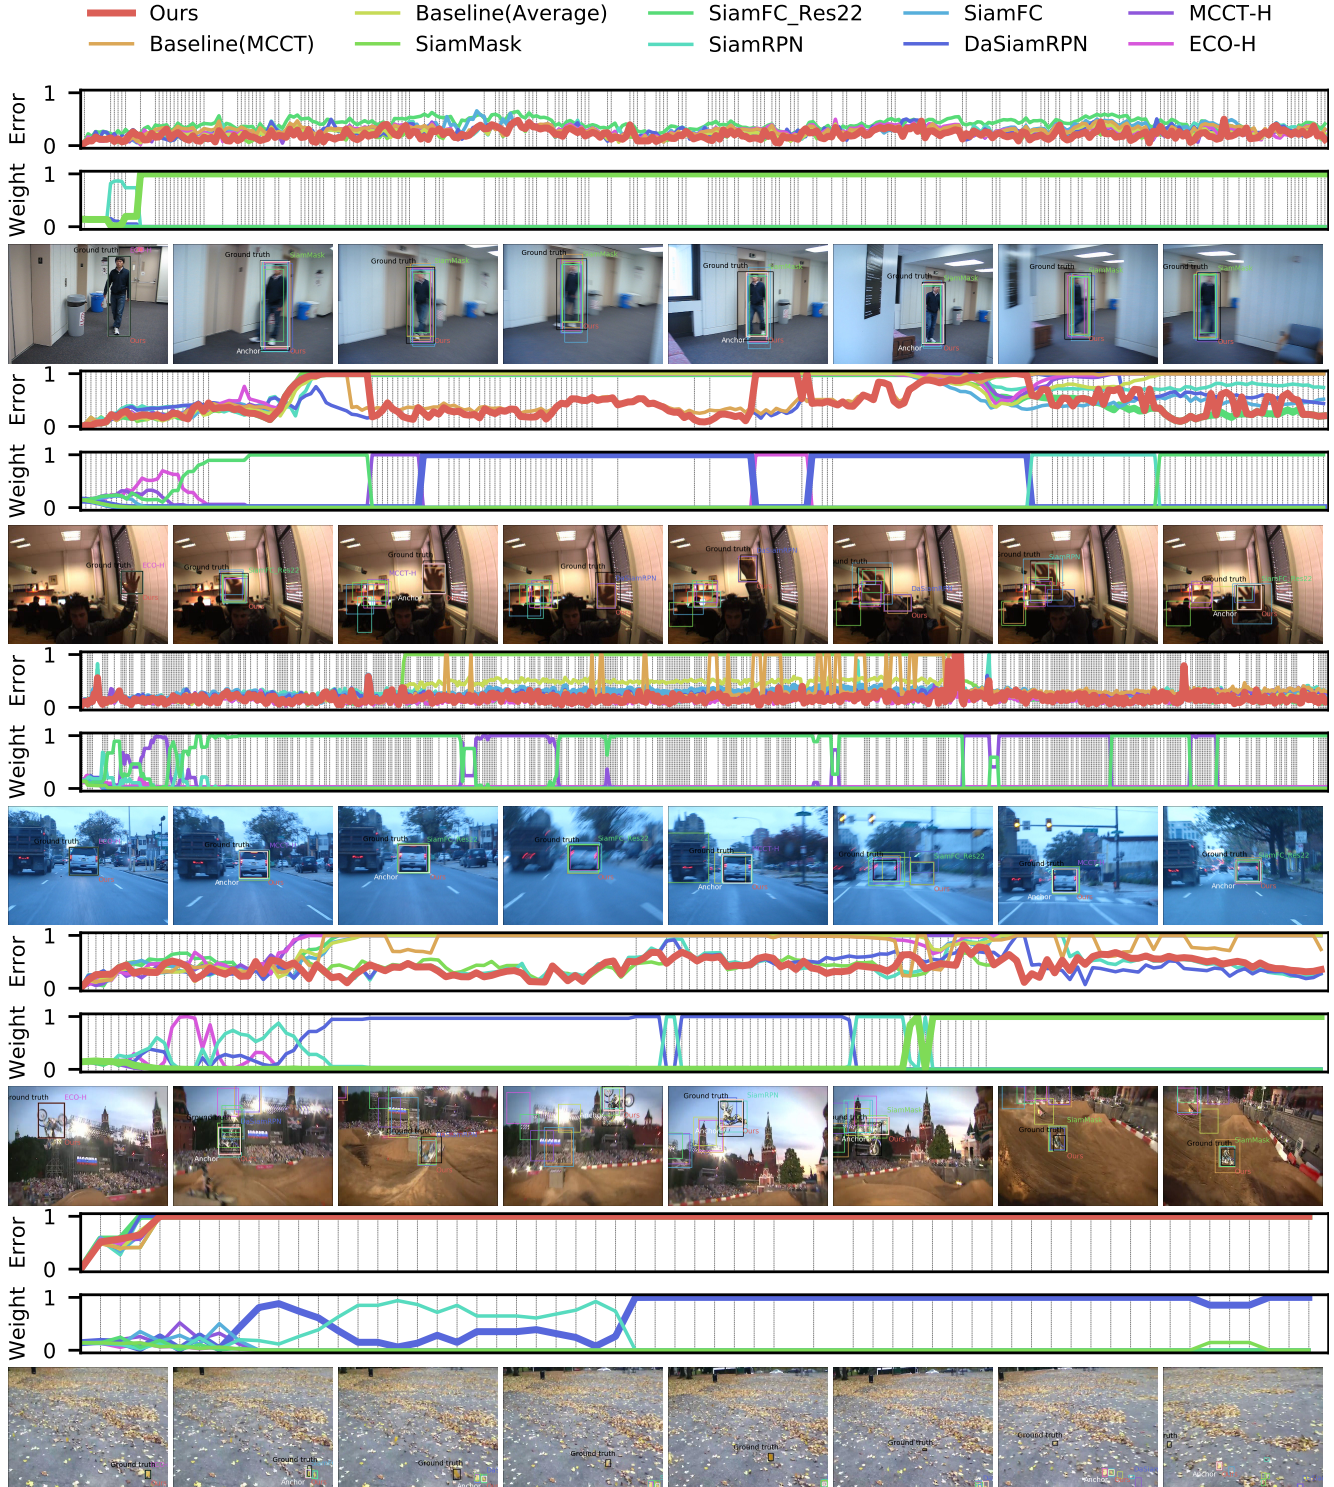

Figure 1. Tracking examples. "BlurBody", "Hand", "car1", "motocross1", and "leaves" in order from top to bottom. In each frame, the results of the proposed method, Baseline(Average), Baseline(MCCT), and the ground truth are shown with the red, yellow, orange, and black boxes, respectively. Specifically, the name of the expert with the highest weight in each frame is displayed. For anchor frames, the detected bounding box is also shown as a white box. In the error and weight graphs, gray vertical lines show anchor frames.

In “Hand,” “car1,” and “motorcross1,” it can be seen that the best-performing experts drastically change in this video sequence. More specifically, for “Hand,” SiamFC\_Res22 achieves the best in the beginning part but it degrades the performance in the middle part. DaSiamRPN achieves the best in the second part, but in the final part SiamFC\_Res22 achieves the best again. By observing the weight transitions, we can see that the proposed method can switch the current best expert adaptively after some anchor frames.

Since the proposed method is based on aggregation, the proposed method fails when all the experts fail. The result of “leaves” shows this case.
