# Supplementary material
Source: ML conference proceedings conference paper supplement (https://openaccess.thecvf.com/content/WACV_2020/html/Song_Adaptive_Aggregation_of_WACV_2020_paper.html)
Supplement: Supplementary file 1 [file Song_Adaptive_Aggregation_of_WACV_2020_supplemental.pdf › Videos/leaves.json]

{
    "@index": "0",
    "@codec_name": "h264",
    "@codec_long_name": "H.264 / AVC / MPEG-4 AVC / MPEG-4 part 10",
    "@profile": "High",
    "@codec_type": "video",
    "@codec_time_base": "1/50",
    "@codec_tag_string": "avc1",
    "@codec_tag": "0x31637661",
    "@width": "320",
    "@height": "480",
    "@coded_width": "320",
    "@coded_height": "480",
    "@has_b_frames": "2",
    "@pix_fmt": "yuv420p",
    "@level": "21",
    "@chroma_location": "left",
    "@refs": "1",
    "@is_avc": "true",
    "@nal_length_size": "4",
    "@r_frame_rate": "25/1",
    "@avg_frame_rate": "25/1",
    "@time_base": "1/12800",
    "@start_pts": "0",
    "@start_time": "0.000000",
    "@duration_ts": "128512",
    "@duration": "10.040000",
    "@bit_rate": "519911",
    "@bits_per_raw_sample": "8",
    "@nb_frames": "251",
    "disposition": {
        "@default": "1",
        "@dub": "0",
        "@original": "0",
        "@comment": "0",
        "@lyrics": "0",
        "@karaoke": "0",
        "@forced": "0",
        "@hearing_impaired": "0",
        "@visual_impaired": "0",
        "@clean_effects": "0",
        "@attached_pic": "0",
        "@timed_thumbnails": "0"
    },
    "tag": [
        {
            "@key": "language",
            "@value": "und"
        },
        {
            "@key": "handler_name",
            "@value": "VideoHandler"
        }
    ]
}
